# Supplementary material
Source: MDPI journal article supplement (https://www.mdpi.com/1424-2818/14/10/823)
Supplement: s1 [file s1]

**Shifts in Community Vegetative Organs and Their Dissimilar Trade-Off Patterns in a Tropical Coastal Secondary Forest, Hainan Island, Southern China**

**Muhammad Yaseen<sup>1</sup>, Wenxing Long<sup>1</sup>, \*Farhan Khalid<sup>2</sup>, Saraj Bahadur<sup>1</sup>, Hamza Armghan Noushahi<sup>3</sup>**

*<sup>1</sup>Wuzhishan National Long-Term Forest Ecosystem Monitoring Research Station; Hainan Key Laboratory for Sustainable Utilization of Tropical Bioresource; College of Forestry, Hainan University, Haikou, 570228, China*

*<sup>2</sup>Faculty of Agriculture and Environment, The Islamia University of Bahawalpur, Pakistan*

*<sup>3</sup>College of Plant Sciences and Technology, Huazhong Agriculture University, Wuhan 430070, China P.R.*

**\*Corresponding author:** Wenxing Long, email: oklong@hainanu.edu.cn

Table S1. Characteristics of plant functional traits of woody plant species in the tropical coastal secondary forest in Tongguling, China

| <b>Trait</b> | <b>Mean</b> | <b>Standard deviation</b> | <b>Minimum</b> | <b>Maximum</b> | <b>Variance</b> | <b>Coefficient of variation (%)</b> |
|--------------|-------------|---------------------------|----------------|----------------|-----------------|-------------------------------------|
| WD           | 0.558       | 0.181                     | 0.183          | 1.464          | 0.033           | 0.325                               |
| LT           | 0.245       | 0.234                     | 0.081          | 2.070          | 0.055           | 0.954                               |
| SLA          | 146.984     | 59.883                    | 57.120         | 430.556        | 3,585.986       | 0.407                               |
| RLWC         | 56.100      | 20.805                    | 0.546          | 84.430         | 432.834         | 0.371                               |
| LOM          | 771.280     | 57.743                    | 618.900        | 904.500        | 3,334.251       | 0.075                               |
| LOC          | 447.599     | 33.521                    | 359.000        | 524.600        | 1,123.687       | 0.075                               |
| LTN          | 17.789      | 4.659                     | 7.920          | 33.480         | 21.705          | 0.262                               |
| LTP          | 0.834       | 0.343                     | 0.286          | 2.569          | 0.118           | 0.411                               |
| SOM          | 783.157     | 32.200                    | 672.700        | 855.900        | 1,036.864       | 0.041                               |
| SOC          | 454.618     | 18.514                    | 390.200        | 496.500        | 342.767         | 0.041                               |
| STN          | 9.498       | 3.106                     | 4.230          | 19.180         | 9.650           | 0.327                               |
| STP          | 0.489       | 0.230                     | 0.205          | 1.658          | 0.053           | 0.471                               |
